# Supplementary material for: Multi-colored hollow carbon-containing titania nanoshells for anti-counterfeiting applications
Source: Royal Society of Chemistry journal article supplement (doi:10.1039/c9tc04146j), 2019-01-01
Supplement: c9tc04146j1.pdf [file c9tc04146j1.pdf]

## Supporting Information

### **Multi-colored hollow carbon-containing titania nanoshells for anti-counterfeiting applications**

**Xiaxi Yao,<sup>a,b,\*</sup> Yaocai Bai,<sup>b</sup> Yoon Jae Lee,<sup>b</sup> Zhimin Qi,<sup>b</sup> Xiaoheng Liu,<sup>c</sup> Yadong Yin<sup>b\*</sup>**

<sup>a</sup> School of Chemistry and Materials Engineering, Changshu Institute of Technology, Changshu 215500, China

<sup>b</sup> Department of Chemistry, University of California, Riverside, California 92521, United States

<sup>c</sup> Key Laboratory for Soft Chemistry and Functional Materials of Ministry Education, Nanjing University of Science and Technology, Nanjing 210094, China

Email: [xiaksiyao@csitg.edu.cn](mailto:xiaksiyao@csitg.edu.cn) (XY); [yadong.yin@ucr.edu](mailto:yadong.yin@ucr.edu) (YY)

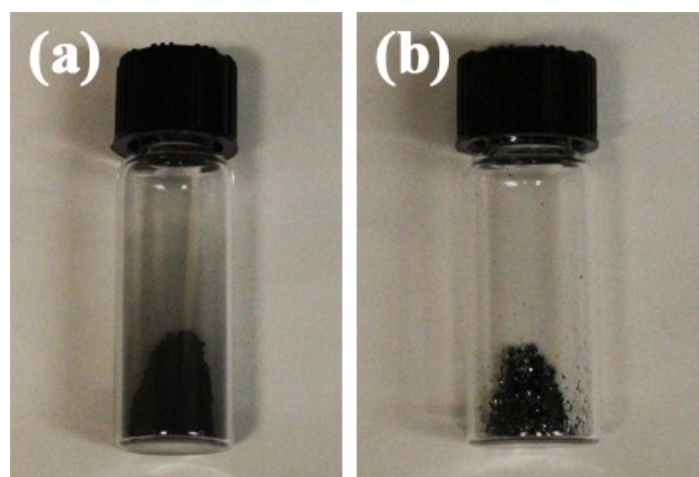

**Fig. S1** Digital photographs of  $\text{TiO}_2$  particles (a) and HPC (b) after calcination at 700 °C for 3h under anaerobic atmosphere.

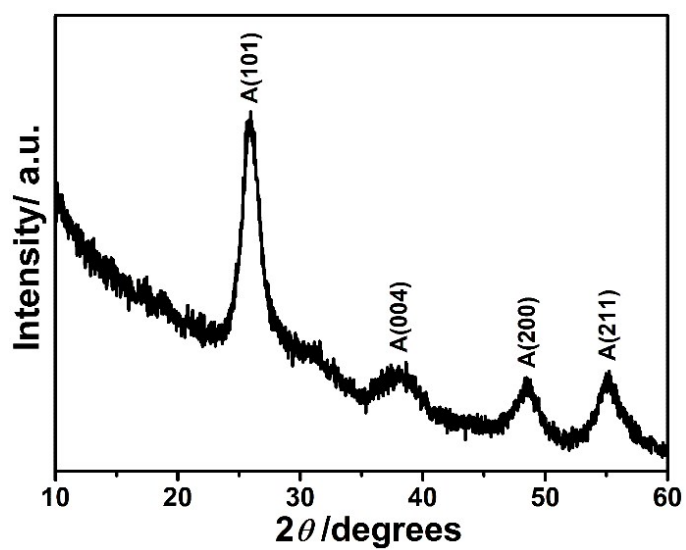

**Fig. S2** XRD pattern of the final C- $\text{TiO}_2$  hollow nanoshells.

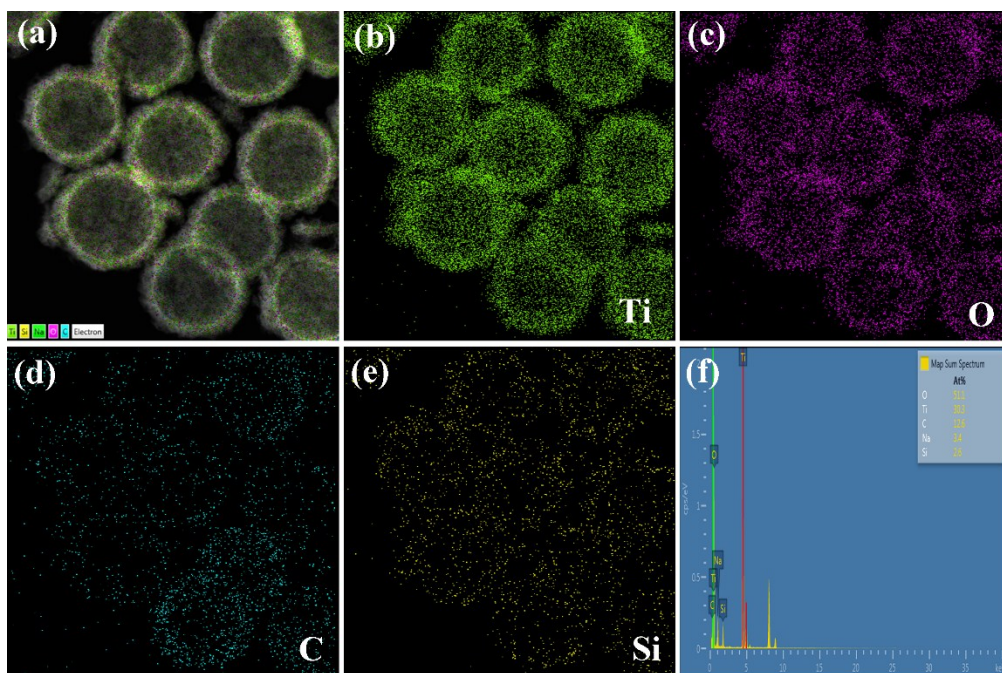

**Fig. S3** Summary EDS elemental mapping of C-TiO<sub>2</sub> hollow nanoshells with 200 nm SiO<sub>2</sub> colloidal templates (a), corresponding EDS elemental mapping of Ti (b), O (c), C (d), and Si (e) from the region in (a), and the element content based on the EDS analysis (f).

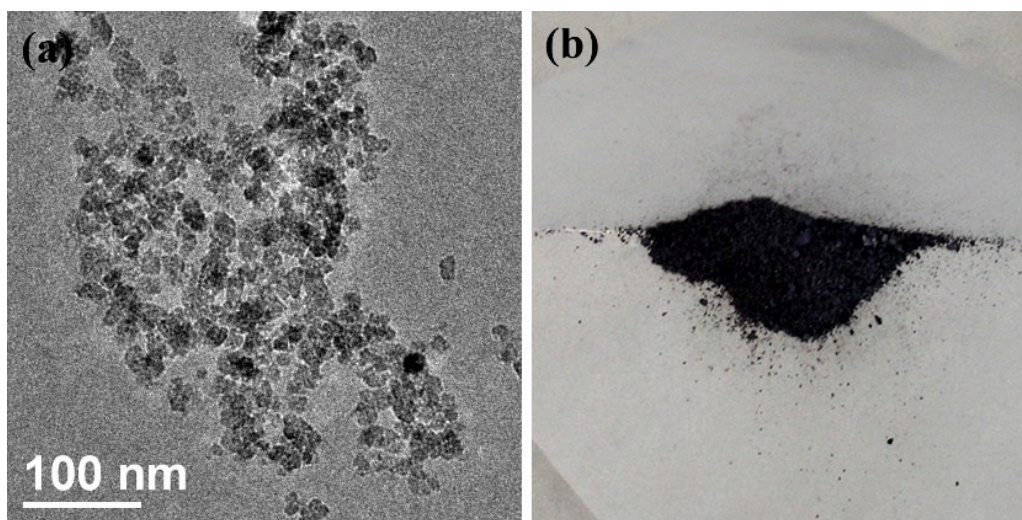

**Fig. S4** TEM image (a) and the corresponding digital photograph (b) of the irregularly-shaped solid TiO<sub>2</sub> particles.

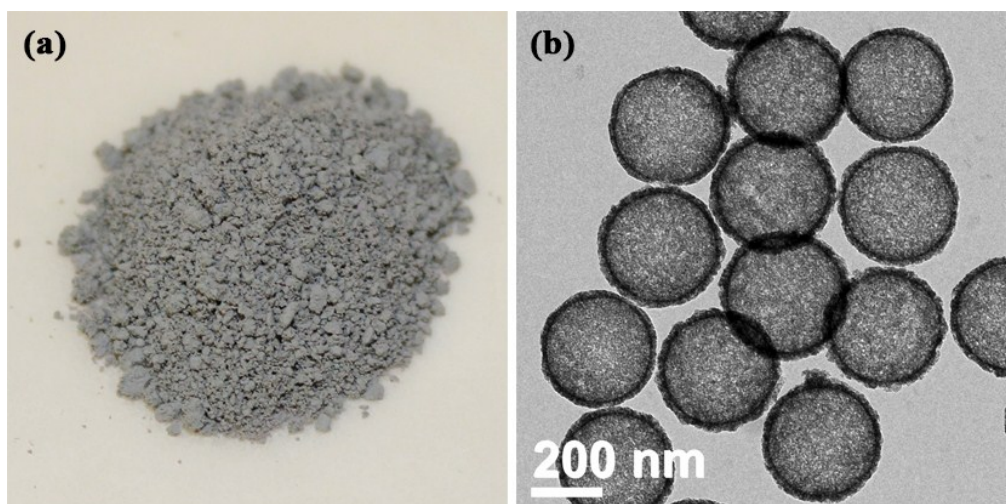

**Fig. S5** Digital photograph (a) and TEM image (b) of 310(20)@C-TiO<sub>2</sub> hollow spheres.

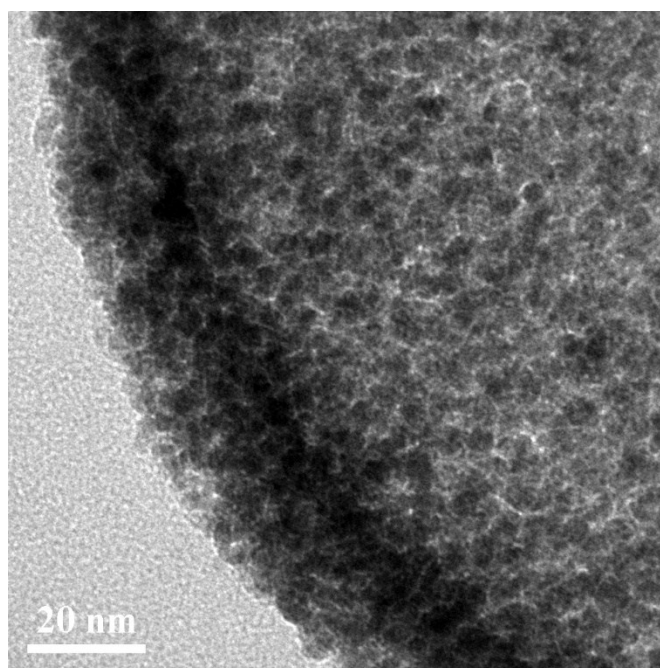

**Fig. S6** HRTEM image of 180(22)@C-TiO<sub>2</sub> hollow nanoshells.



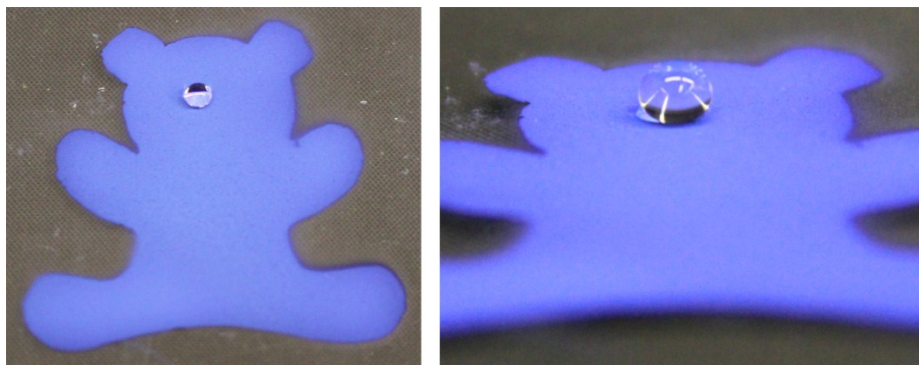

**Fig. S7** Water droplet on the sprayed purple film with a panda shape.
